# Supplementary material for: Atherogenic Plasma Index or Non-High-Density Lipoproteins as Markers Best Reflecting Age-Related High Concentrations of Small Dense Low-Density Lipoproteins
Source: MDPI journal article supplement (doi:10.3390/ijms23095089), 2022-05-03
Supplement: s1 [file s1]

**Table S2. The frequency of metabolic disorders in all study participants, regarding to the age group**

| Parameter                | Age <35 years | Age ≥35 years | <i>p</i>         |
|--------------------------|---------------|---------------|------------------|
|                          | N=279         | N=206         |                  |
|                          | W=189, M=90   | W=124, M=82   |                  |
|                          | n (%)         | n (%)         |                  |
| FG, ≥5.5 mmol/L          | 31 (11.1)     | 59 (28.6)     | <b>&lt;0.001</b> |
| TC, ≥5.0 mmol/L          | 68 (24.3)     | 129 (62.6)    | <b>&lt;0.001</b> |
| HDL-C, ≤1.2 mmol/L Women | 47 (24.9)     | 34 (27.4)     | 0.614            |
| HDL-C, <1.0 mmol/L Men   | 11 (12.2)     | 16 (19.5)     | 0.189            |
| LDL-C, ≥3.0 mmol/L       | 67 (24.0)     | 128 (62.1)    | <b>&lt;0.001</b> |
| non-HDL-C, ≥3.4 mmol/L   | 71 (25.4)     | 140 (68.0)    | <b>&lt;0.001</b> |
| TG, ≥1.7 mmol/L          | 27 (9.7)      | 58 (28.2)     | <b>&lt;0.001</b> |
| TC/HDL Women, ≥4.0       | 16 (8.5)      | 44 (35.5)     | <b>&lt;0.001</b> |
| TC/HDL Men, ≥ 4.5        | 18 (20.0)     | 28 (34.1)     | <b>0.036</b>     |
| API, ≥ 0.15              | 26 (9.3)      | 44 (21.4)     | <b>&lt;0.001</b> |

W – women, M – Men, FG - Fasting Glucose, TC - Total Cholesterol, HDL-C - High Density Lipoprotein Cholesterol, LDL-C - Low Density Lipoprotein Cholesterol, non-HDL - non-High Density Lipoprotein Cholesterol, TG - Triglycerides, TC/HDL - Total Cholesterol to High Density Lipoprotein Cholesterol Ratio, API - Atherogenic Plasma Index,
