# Supplementary material for: Atherogenic Plasma Index or Non-High-Density Lipoproteins as Markers Best Reflecting Age-Related High Concentrations of Small Dense Low-Density Lipoproteins
Source: MDPI journal article supplement (doi:10.3390/ijms23095089), 2022-05-03
Supplement: s1 [file s1]

**Table S1. sdLDL Quartile characteristic among healthy participants**

| Parameter              | sdLDL Quartile 1 <0.46<br>mmol/L<br>N=36 | sdLDL Quartile 2 ≥0.46 -<br><0.62 mmol/L<br>N=31 | sdLDL Quartile 3 ≥0.62<br>- <1.03 mmol/L<br>N=46 | sdLDL Quartile 4<br>>1.03 mmol/L<br>N=39 | <i>p</i> value for<br>model |
|------------------------|------------------------------------------|--------------------------------------------------|--------------------------------------------------|------------------------------------------|-----------------------------|
| Women, n(%)            | 25 (69.4)                                | 24 (77.4)                                        | 32 (69.6)                                        | 33 (84.6)                                | 0.324                       |
| Age <35 y. n(%)        | 32 (94.1%)                               | 29 (93.5%)                                       | 43 (95.6%)                                       | 33 (84.6%)                               | 0.267                       |
| FG, mmol/L             | 4.76 [4.48-5.01]                         | 4.82 [4.54-5.04]                                 | 4.70 [4.48-5.04]                                 | 4.70 [4.37-5.04]                         | 0.865                       |
| TC, mmol/L             | 3.98 [3.75-4.44]                         | 4.08 [3.82-4.42]                                 | 4.31 [4.08-4.50]                                 | 4.31 [4.08-4.52]                         | <b>0.035<sup>a</sup></b>    |
| HDL-C, mmol/L<br>Women | 1.58 [1.42-1.78]                         | 1.60 [1.47-1.72]                                 | 1.60 [1.50-1.87]                                 | 1.47 [1.42-1.57]                         | 0.087                       |
| HDL-C, mmol/L<br>Men   | 1.24 [1.15-1.65]                         | 1.24 [1.08-1.32]                                 | 1.29 [1.14-1.42]                                 | 1.21 [1.06-1.29]                         | 0.685                       |
| LDL-C, mmol/L          | 2.09 [1.87-2.38]                         | 2.22 [1.81-2.58]                                 | 2.35 [2.04-2.56]                                 | 2.30 [2.09-2.61]                         | 0.107                       |
| non-HDL -C,<br>mmol/L  | 2.51 [2.23-2.82]                         | 2.79 [2.01-2.97]                                 | 2.76 [2.45-3.00]                                 | 2.84 [2.53-2.97]                         | 0.067                       |
| TG, mmol/L             | 0.90 [0.61-1.09]                         | 0.81 [0.56-1.00]                                 | 0.86 [0.60-1.04]                                 | 0.87 [0.74-1.37]                         | 0.180                       |

|        |                  |                  |                  |                  |       |
|--------|------------------|------------------|------------------|------------------|-------|
| TC/HDL | 2.71 [2.46-2.91] | 2.76 [2.36-3.15] | 2.77 [2.44-3.12] | 2.87 [2.54-3.16] | 0.391 |
|--------|------------------|------------------|------------------|------------------|-------|

---

|     |                       |                       |                       |                       |       |
|-----|-----------------------|-----------------------|-----------------------|-----------------------|-------|
| API | -0.22 [-0.42-(-0.17)] | -0.26 [-0.52-(-0.13)] | -0.27 [-0.39-(-0.12)] | -0.20 [-0.30-(-0.03)] | 0.210 |
|-----|-----------------------|-----------------------|-----------------------|-----------------------|-------|

<sup>a</sup> post-hoc test showed no significant differences

FG- Fasting Glucose, TC - Total Cholesterol, HDL-C - High Density Lipoprotein Cholesterol, LDL-C - Low Density Lipoprotein Cholesterol, non-HDL - non-High Density Lipoprotein Cholesterol, TG - Triglicerydes, TC/HDL - Total Cholesterol to High Density Lipoprotein Cholesterol Ratio, API - Atherogenic Plasma Index, sdLDL - small, dense Low Density Lipoprotein Cholesterol,
