# Supplementary material for: Atherogenic Plasma Index or Non-High-Density Lipoproteins as Markers Best Reflecting Age-Related High Concentrations of Small Dense Low-Density Lipoproteins
Source: MDPI journal article supplement (doi:10.3390/ijms23095089), 2022-05-03
Supplement: s1 [file s1]

**Table S3. Small dense LDL Quartile characteristic among all study participants**

| Parameter          | sdLDL Quartile 1 | sd LDL Quartile 2  | sdLDL Quartile 3   | sdLDL Quartile 4 | <i>p</i>                          |
|--------------------|------------------|--------------------|--------------------|------------------|-----------------------------------|
|                    | <0.46 mmol/L     | ≥0.46–<0.62 mmol/L | ≥0.62–<1.03 mmol/L | >1.03 mmol/L     |                                   |
|                    | N=73             | N=77               | N=183              | N=152            |                                   |
|                    | (Me [Q1-Q3])     | (Me [Q1-Q3])       | (Me [Q1-Q3])       | (Me [Q1-Q3])     |                                   |
| Women, n(%)        | 52 (71.2)        | 46 (59.7)          | 115 (62.8)         | 100 (65.8)       | 0.468                             |
| Age <35 y. n(%)    | 53 (72.6)        | 45 (58.44)         | 100 (54.6)         | 81 (53.3)        | <b>0.036</b>                      |
|                    |                  |                    |                    |                  | <i>p</i> for trend = <b>0.012</b> |
| FG,mmol/L          | 4.76 [4.48-5.21] | 5.04 [4.65-5.49]   | 4.98 [4.65-5.43]   | 5.04 [4.62-5.52] | 0.057                             |
|                    | 4.21 [3.80-4.65] | 4.31 [3.82-4.73]   | 4.93 [4.41-5.50]   | 4.88 [4.30-4.93] | <b>&lt;0.001</b>                  |
| TC,mmol/L          |                  |                    | vs.Q1; p<0.001     | vs.Q1; p<0.001   |                                   |
|                    |                  |                    | vs.Q2; p<0.001     | vs.Q2; p<0.001   |                                   |
| HDL-C,mmol/L Women | 1.38 [1.22-1.65] | 1.47 [1.32-1.70]   | 1.50 [1.29-1.73]   | 1.44 [1.29-1.70] | 0.395                             |
|                    | 1.34 [1.19-1.58] | 1.24 [1.08-1.37]   | 1.33 [1.11-1.51]   | 1.12 [0.98-1.34] | <b>&lt;0.001</b>                  |
| HDL-C,mmol/L Men   |                  |                    |                    | vs.Q1; p=0.003   |                                   |
|                    |                  |                    |                    | vs.Q3; p=0.005   |                                   |

|                  |                       |                        |                    |                    |                  |
|------------------|-----------------------|------------------------|--------------------|--------------------|------------------|
|                  | 2.30 [2.07-2.69]      | 2.47 [2.09-2.89]       | 3.02 [2.43-3.49]   | 2.95 [2.30-3.86]   | <b>&lt;0.001</b> |
| LDL-C,mmol/L     |                       |                        | vs.Q1; p<0.001     | vs.Q1; p<0.001     |                  |
|                  |                       |                        | vs.Q2; p<0.001     | vs.Q2; p<0.001     |                  |
|                  | 2.76 [2.48-3.15]      | 2.92 [2.48-3.23]       | 3.51 [2.92-4.08]   | 3.51 [2.87-4.55]   | <b>&lt;0.001</b> |
| non-HDL-C,mmol/L |                       |                        | vs.Q1; p<0.001     | vs.Q1; p<0.001     |                  |
|                  |                       |                        | vs.Q2; p<0.001     | vs.Q2; p<0.001     |                  |
|                  | 0.89 [0.67-1.15]      | 0.84 [0.61-1.18]       | 1.06 [0.81-1.58]   | 1.24 [0.85-1.84]   | <b>&lt;0.001</b> |
| TG,mmol/L        |                       |                        | vs. Q1; p<0.001    | vs. Q1; p<0.001    |                  |
|                  |                       |                        | vs. Q2; p<0.001    | vs. Q2; p<0.001    |                  |
|                  | 2.94 [2.62-3.39]      | 3.15 [2.68-3.61]       | 3.52 [2.91-4.18]   | 3.59 [2.98-4.58]   | <b>&lt;0.001</b> |
| TC/HDL           |                       |                        | vs. Q1; p<0.001    | vs. Q1; p<0.001    |                  |
|                  |                       |                        | vs. Q2; p=0.023    | vs. Q2; p=0.001    |                  |
|                  | -0.21 [-0.33- (0.08)] | - 0.19 [-0.34-(-0.02)] | -0.12 [-0.29-0.07] | -0.04 [-0.22-0.13] | <b>&lt;0.001</b> |
| API              |                       |                        | vs. Q1; p=0.038    | vs. Q1; p<0.001    |                  |
|                  |                       |                        |                    | vs. Q2; p<0.001    |                  |

FG- Fasting Glucose, TC - Total Cholesterol, HDL-C - High Density Lipoprotein Cholesterol, LDL-C - Low Density Lipoprotein Cholesterol, non-HDL - non-High Density Lipoprotein Cholesterol, TG - Triglycerides, TC/HDL - Total Cholesterol to High Density Lipoprotein Cholesterol Ratio, API - Atherogenic Plasma Index, sdLDL - small, dense Low Density Lipoprotein Cholesterol,
